# Supplementary material
Source: MDPI journal article supplement (https://www.mdpi.com/1424-8247/14/8/790)
Supplement: s1 [file s1]

# Predicting the Skin Sensitization Potential of Small Molecules with Machine Learning Models Trained on Biologically Meaningful Descriptors

Anke Wilm <sup>1,2</sup>, Marina Garcia de Lomana <sup>3</sup>, Conrad Stork <sup>1</sup>, Neann Mathai <sup>4</sup>, Steffen Hirte <sup>3</sup>, Ulf Norinder <sup>5,6,7</sup>, Jochen Kühnl <sup>8</sup> and Johannes Kirchmair <sup>1,3\*</sup>

<sup>1</sup> Center for Bioinformatics (ZBH), Department of Informatics, Universität Hamburg, 20146 Hamburg, Germany; wilm@zbh.uni-hamburg.de (A.W.); stork@zbh.uni-hamburg.de (C.S.)

<sup>2</sup> HITeC e.V., 22527 Hamburg, Germany

<sup>3</sup> Department of Pharmaceutical Sciences, Faculty of Life Sciences, University of Vienna, 1090 Vienna, Austria; a11853333@unet.univie.ac.at (M.G.d.L.); steffen.hirte@univie.ac.at (S.H.)

<sup>4</sup> Computational Biology Unit (CBU), Department of Chemistry, University of Bergen, N-5020 Bergen, Norway; neann.mathai@uib.no

<sup>5</sup> MTM Research Centre, School of Science and Technology, Örebro University, SE-70182 Örebro, Sweden; ulf.norinder@farmbio.uu.se

<sup>6</sup> Department of Computer and Systems Sciences, Stockholm University, SE-16407 Kista, Sweden

<sup>7</sup> Department of Pharmaceutical Biosciences, Uppsala University, SE-75124 Uppsala, Sweden

<sup>8</sup> Front End Innovation, Beiersdorf AG, 22529 Hamburg, Germany; Jochen.Kuehnl@Beiersdorf.com

\* Correspondence: johannes.kirchmair@univie.ac.at; Tel.: +43-1-4277-55104

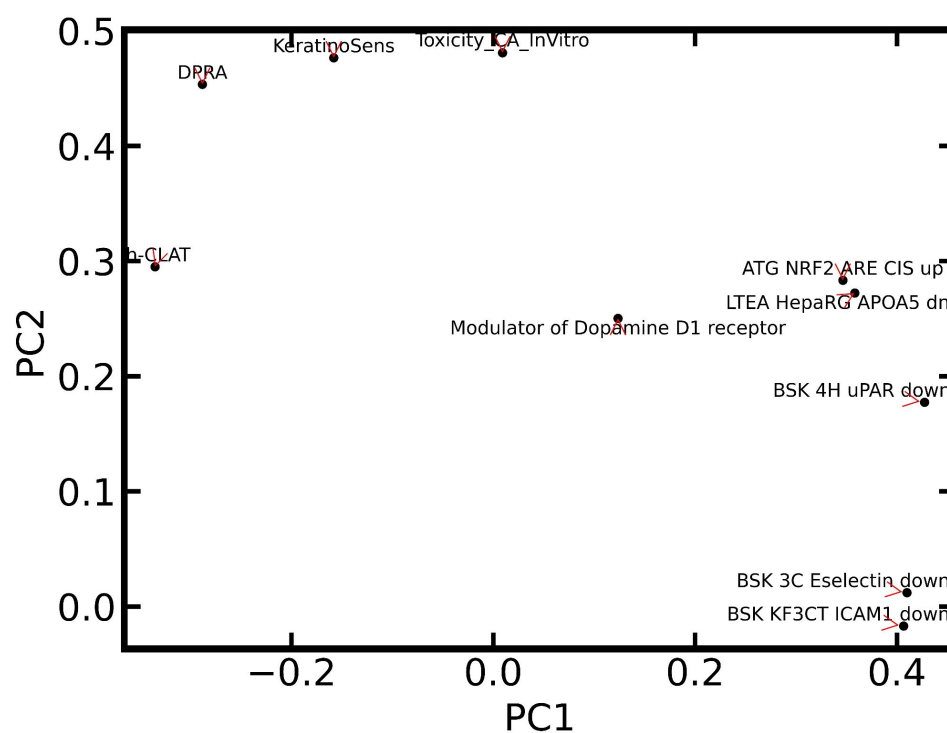

**Figure S1.** Loadings plot for the PCA on the LLNA and the three reference data sets, based on the ten selected bioactivity descriptors.

**Table S1.** Mean absolute Lasso coefficients and standard deviation  $\sigma$  retrieved from the 10-fold cross-validation.

| Assay name                                           | Mean Lasso coefficient | $\sigma(\text{Lasso coefficient})$ | Correlation to positive assay outcome |
|------------------------------------------------------|------------------------|------------------------------------|---------------------------------------|
| p0 BSK KF3CT ICAM1 down                              | 0.074                  | 0.0088                             | positive                              |
| p1 BSK 4H uPAR down                                  | 0.051                  | 0.0454                             | negative                              |
| p0 CA                                                | 0.049                  | 0.0096                             | positive                              |
| p1 DPRA                                              | 0.047                  | 0.0125                             | positive                              |
| p1 Modulator of Dopamine D1 receptor                 | 0.045                  | 0.0064                             | positive                              |
| p1-h-CLAT                                            | 0.043                  | 0.0134                             | positive                              |
| p1 BSK 3C Eselectin down                             | 0.043                  | 0.0210                             | positive                              |
| p1 LTEA HepaRG APOA5 dn                              | 0.040                  | 0.0123                             | negative                              |
| p1-KeratinoSens                                      | 0.039                  | 0.0036                             | positive                              |
| p0 ATG NRF2 ARE CIS up                               | 0.036                  | 0.0142                             | positive                              |
| p0 Modulator of Muscarinic acetylcholine receptor M1 | 0.036                  | 0.0145                             | positive                              |
| p0 Inhibitors and Substrates of Cytochrome P450 2C9  | 0.032                  | 0.0064                             | positive                              |

|                                                                        |       |        |          |
|------------------------------------------------------------------------|-------|--------|----------|
| p1 OT ER ERaERb 1440                                                   | 0.026 | 0.0129 | positive |
| p1 AMES                                                                | 0.026 | 0.0098 | positive |
| p1 LTEA HepaRG FABP1 dn                                                | 0.025 | 0.0144 | negative |
| p1 BSK hDFCGF IP10 down                                                | 0.025 | 0.0200 | positive |
| p1 Activators of the human pregnane X receptor (PXR) signaling pathway | 0.025 | 0.0164 | negative |
| p0 TOX21 RAR LUC Agonist                                               | 0.022 | 0.0095 | negative |
| p1 BSK LPS TNFa down                                                   | 0.022 | 0.0212 | negative |
| p1 TOX21 MMP ratio up                                                  | 0.022 | 0.0125 | negative |
| p1 TOX21 ERa BLA Agonist ratio                                         | 0.021 | 0.0154 | negative |
| p1 UPITT HCI U2OS AR TIF2 Nucleoli Antagonist                          | 0.021 | 0.0145 | positive |
| p0 Modulator of Muscarinic acetylcholine receptor M4                   | 0.020 | 0.0074 | positive |
| p0 OT AR ARSRC1 0480                                                   | 0.020 | 0.0204 | positive |
| p1 Modulator of Melatonin receptor 1B                                  | 0.019 | 0.0069 | negative |
| p1 LTEA HepaRG ABCB1 up                                                | 0.019 | 0.0100 | negative |
| p0 Induce genoin human embryonic kidney cells                          | 0.019 | 0.0092 | negative |
| p1 TOX21 HDAC Inhibition                                               | 0.018 | 0.0156 | positive |
| p0 Modulator of Monoamine oxidase A                                    | 0.018 | 0.0044 | positive |
| p0 TOX21 TR LUC GH3 Antagonist                                         | 0.017 | 0.0234 | positive |
| p0 Mutagenicity                                                        | 0.016 | 0.0134 | negative |
| p0 LTEA HepaRG CYP2E1 dn                                               | 0.015 | 0.0167 | positive |
| p1 ATG RORE CIS up                                                     | 0.015 | 0.0107 | negative |
| p1 ATG DR4 LXR CIS dn                                                  | 0.014 | 0.0092 | positive |
| p1 Modulator of Androgen Receptor                                      | 0.013 | 0.0070 | negative |
| p1 Differential cyto(isogenic chicken DT40 Rev3 mutant cell line)      | 0.013 | 0.0104 | positive |
| p1 Block Bile Salt Export Pump                                         | 0.013 | 0.0103 | negative |
| p0 Modulator of Adenosine A1 receptor                                  | 0.013 | 0.0066 | negative |
| p0 Agonist of the AP-1 signaling pathway                               | 0.013 | 0.0166 | positive |
| p1 LTEA HepaRG CYP1A1 up                                               | 0.012 | 0.0093 | positive |
| p1 Inhibitors and Substrates of Cytochrome P450 2D6                    | 0.012 | 0.0111 | positive |
| p1 TOX21 FXR BLA antagonist ratio                                      | 0.011 | 0.0182 | positive |
| p0 UPITT HCI U2OS AR TIF2 Nucleoli Agonist                             | 0.011 | 0.0142 | negative |

|                                                                                                                                 |       |        |          |
|---------------------------------------------------------------------------------------------------------------------------------|-------|--------|----------|
| p0 LTEA HepaRG CYP1A2 up                                                                                                        | 0.011 | 0.0087 | positive |
| p0 BSK 3C Eselectin down                                                                                                        | 0.011 | 0.0141 | positive |
| p0 Modulator of Platelet activating factor receptor                                                                             | 0.011 | 0.0072 | negative |
| p0 NHEERL ZF 144hpf TERATOSCORE up                                                                                              | 0.011 | 0.0077 | positive |
| p1 Agonist of the RXR signaling pathway                                                                                         | 0.010 | 0.0074 | negative |
| p1 TOX21 AP1 BLA Agonist ratio                                                                                                  | 0.010 | 0.0138 | negative |
| p0 TOX21 PR BLA Antagonist ratio                                                                                                | 0.010 | 0.0125 | negative |
| p1 Caco2                                                                                                                        | 0.009 | 0.0113 | positive |
| p1 BSK hDFCGF MCSF down                                                                                                         | 0.009 | 0.0069 | positive |
| p1 Differential cytoagainst isogenic chicken DT40 cell lines with known DNA damage response pathways Rad54Ku70 mutant cell line | 0.008 | 0.0086 | positive |
| p1 TOX21 AhR LUC Agonist                                                                                                        | 0.008 | 0.0107 | negative |
| p0 NCCT HEK293T CellTiterGLO                                                                                                    | 0.008 | 0.0096 | positive |
| p0 Antagonist of the retinoic acid receptor (RAR) signaling pathway                                                             | 0.008 | 0.0108 | negative |
| p1 TOX21 ERa LUC VM7 Agonist                                                                                                    | 0.008 | 0.0036 | negative |
| p1 ATG RXRb TRANS up                                                                                                            | 0.007 | 0.0065 | positive |
| p1 TOX21 MMP ratio down                                                                                                         | 0.007 | 0.0127 | positive |
| p1 Modulator of Calcitonin gene-related peptide type 1 receptor                                                                 | 0.007 | 0.0061 | positive |
| p0 Modulator of Glutamate NMDA receptor                                                                                         | 0.007 | 0.0067 | negative |
| p0 Modulator of Neurokinin 2 receptor                                                                                           | 0.007 | 0.0066 | negative |
| p1 BSK hDFCGF TIMP1 down                                                                                                        | 0.007 | 0.0139 | positive |
| p0 Modulator of Adenosine A3 receptor                                                                                           | 0.007 | 0.0101 | negative |
| p1 ATG NRF2 ARE CIS up                                                                                                          | 0.006 | 0.0079 | positive |
| p1 Modulator of Dopamine transporter                                                                                            | 0.006 | 0.0063 | positive |
| p1 ATG Ets CIS dn                                                                                                               | 0.006 | 0.0084 | negative |
| p0 Cytoin HepG2 cells 40 hour                                                                                                   | 0.006 | 0.0106 | negative |
| p1 ATG PBREM CIS up                                                                                                             | 0.006 | 0.0101 | negative |
| p0 Inhibit CYP1A2 Activity                                                                                                      | 0.006 | 0.0119 | positive |
| p1 LTEA HepaRG ALPP dn                                                                                                          | 0.006 | 0.0169 | negative |
| p1 CA                                                                                                                           | 0.006 | 0.0104 | positive |

|                                                                           |       |        |          |
|---------------------------------------------------------------------------|-------|--------|----------|
| p0 Modulator of Neuronal acetylcholine receptor alpha4beta2               | 0.006 | 0.0072 | positive |
| p0 Block Bile Salt Export Pump                                            | 0.005 | 0.0108 | negative |
| p1 TOX21 RXR BLA Agonist ratio                                            | 0.005 | 0.0060 | negative |
| p1 BSK BE3C IL1a down                                                     | 0.005 | 0.0141 | negative |
| p0 Modulator of Melatonin receptor 1B                                     | 0.005 | 0.0040 | negative |
| p1 ATG HIF1a CIS up                                                       | 0.005 | 0.0053 | negative |
| p0 Modulator of Receptor protein-tyrosine kinase erbB-2                   | 0.005 | 0.0084 | positive |
| p0 OT ER ERaERb 1440                                                      | 0.005 | 0.0117 | positive |
| p0 Modulator of Cholecystokinin A receptor                                | 0.005 | 0.0051 | negative |
| p1 Disruptors of the mitochondrial membrane potential                     | 0.005 | 0.0069 | positive |
| p0 Modulator of Sodium channel protein type IX alpha subunit              | 0.004 | 0.0046 | negative |
| p1 UPITT HCI U2OS AR TIF2 Nucleoli Agonist                                | 0.004 | 0.0065 | negative |
| p0 BSK CASM3C MCP1 down                                                   | 0.004 | 0.0074 | positive |
| p0 Modulator of GABA-A receptor alpha-1beta-3gamma-2                      | 0.003 | 0.0059 | negative |
| p0 LTEA HepaRG CYP1A1 up                                                  | 0.003 | 0.0075 | positive |
| p0 Modulator of Neuronal acetylcholine receptor protein alpha-7 subunit   | 0.003 | 0.0060 | negative |
| p0 Cytoin HepG2 cells 32 hour                                             | 0.003 | 0.0070 | negative |
| p1 Modulator of Sodium channel protein type IX alpha subunit              | 0.003 | 0.0033 | negative |
| p1 ATG C EBP CIS up                                                       | 0.003 | 0.0055 | negative |
| p1 Modulator of Acetylcholinesterase                                      | 0.003 | 0.0034 | positive |
| p1 BSK hDFCGF Proliferation down                                          | 0.003 | 0.0044 | positive |
| p1 OT FXR FXRSRC1 1440                                                    | 0.003 | 0.0085 | negative |
| p0 Modulator of Serotonin 7 (5-HT7) receptor                              | 0.003 | 0.0050 | positive |
| p1 Modulator of GABA-A receptor alpha-2beta-3gamma-2                      | 0.003 | 0.0038 | negative |
| p1 Antagonist of the estrogen receptor alpha (ER-alpha) signaling pathway | 0.003 | 0.0052 | negative |
| p1 ATG E Box CIS dn                                                       | 0.003 | 0.0080 | positive |
| p1 Modulator of Serotonin 2b (5-HT2b) receptor                            | 0.003 | 0.0046 | negative |

|                                                                        |       |        |          |
|------------------------------------------------------------------------|-------|--------|----------|
| p1 ATG ERa TRANS up                                                    | 0.003 | 0.0039 | positive |
| p1 TOX21 TSHR Agonist ratio                                            | 0.002 | 0.0061 | positive |
| p1 Modulator of Serotonin 7 (5-HT7) receptor                           | 0.002 | 0.0026 | negative |
| p0 Modulator of Dopamine transporter                                   | 0.002 | 0.0044 | positive |
| p1 BSK SAg CD69 down                                                   | 0.002 | 0.0068 | positive |
| p1 ATG BRE CIS up                                                      | 0.002 | 0.0040 | negative |
| p1 ACEA ER 80hr                                                        | 0.002 | 0.0052 | negative |
| p1 Modulator of Adenosine A1 receptor                                  | 0.002 | 0.0032 | negative |
| p1 APR HepG2 CellLoss 72h dn                                           | 0.002 | 0.0059 | negative |
| p0 Activators of the human pregnane X receptor (PXR) signaling pathway | 0.002 | 0.0043 | negative |
| p0 Modulator of Norepinephrine transporter                             | 0.002 | 0.0030 | positive |
| p0 Modulator of Vascular endothelial growth factor receptor 2          | 0.002 | 0.0054 | positive |
| p0 BSK CASM3C MCSF down                                                | 0.002 | 0.0029 | positive |
| p1 Modulator of Alpha-1a adrenergic receptor                           | 0.002 | 0.0035 | positive |
| p1 BSK hDFCGF CollagenIII down                                         | 0.002 | 0.0034 | positive |
| p0 Modulator of Serotonin 2b (5-HT2b) receptor                         | 0.002 | 0.0030 | negative |
| p0 Modulators of myocardial damage                                     | 0.002 | 0.0026 | positive |
| p0 Modulator of HERG                                                   | 0.002 | 0.0048 | negative |
| p1 BSK CASM3C MCSF down                                                | 0.002 | 0.0048 | positive |
| p1 ATG PXR TRANS up                                                    | 0.002 | 0.0048 | positive |
| p1 Modulator of Alpha-2a adrenergic receptor                           | 0.002 | 0.0024 | positive |
| p0 Modulator of Serotonin 1b (5-HT1b) receptor                         | 0.002 | 0.0037 | negative |
| p0 Modulator of Peroxisome proliferator-activated receptor gamma       | 0.001 | 0.0041 | negative |
| p1 Modulator of P2X purinoceptor 7                                     | 0.001 | 0.0019 | negative |
| p0 Modulator of Cannabinoid CB2 receptor                               | 0.001 | 0.0043 | positive |
| p0 Modulator of P2X purinoceptor 3                                     | 0.001 | 0.0042 | positive |
| p1 Activator the aryl hydrocarbon receptor (AhR) signaling pathway     | 0.001 | 0.0028 | negative |
| p1 Modulator of Serotonin 1b (5-HT1b) receptor                         | 0.001 | 0.0027 | negative |
| p1 ATG PPARg TRANS up                                                  | 0.001 | 0.0028 | positive |
| p0 Modulator of Delta opioid receptor                                  | 0.001 | 0.0032 | positive |

|                                                                                                                                 |       |        |          |
|---------------------------------------------------------------------------------------------------------------------------------|-------|--------|----------|
| p1 ATG ISRE CIS dn                                                                                                              | 0.001 | 0.0025 | negative |
| p1 Modulator of Histamine H1 receptor                                                                                           | 0.001 | 0.0024 | positive |
| p1 Modulator of Platelet-derived growth factor receptor beta                                                                    | 0.001 | 0.0026 | positive |
| p1 ACEA AR antagonist 80hr                                                                                                      | 0.001 | 0.0035 | negative |
| p1 DIO1                                                                                                                         | 0.001 | 0.0032 | positive |
| p0 Differential cytoagainst isogenic chicken DT40 cell lines with known DNA damage response pathways Rad54Ku70 mutant cell line | 0.001 | 0.0033 | positive |
| p0 Modulator of Calcitonin gene-related peptide type 1 receptor                                                                 | 0.001 | 0.0032 | negative |
| p1 TOX21 ERR Agonist                                                                                                            | 0.001 | 0.0032 | positive |
| p1 TOX21 DT40                                                                                                                   | 0.001 | 0.0032 | positive |
| p1 Modulator of Neuronal acetylcholine receptor alpha4beta2                                                                     | 0.001 | 0.0014 | negative |
| p0 Caco2                                                                                                                        | 0.001 | 0.0032 | positive |
| p1 TOX21 AR LUC MDAKB2 Agonist                                                                                                  | 0.001 | 0.0032 | negative |
| p1 Inhibitors of Hepatocyte nuclear factor 4 (HNF4) dimerization                                                                | 0.001 | 0.0031 | positive |
| p0 Modulator of Neurokinin 1 receptor                                                                                           | 0.001 | 0.0029 | negative |
| p1 Modulator of Adenosine A2a receptor                                                                                          | 0.001 | 0.0026 | negative |
| p1 Antagonist of the farnesoid-X-receptor (FXR) signaling pathway                                                               | 0.001 | 0.0021 | negative |
| p1 Modulator of Dopamine D2 receptor                                                                                            | 0.001 | 0.0020 | positive |
| p0 AMES                                                                                                                         | 0.001 | 0.0014 | positive |
| p0 LTEA HepaRG UGT1A1 up                                                                                                        | 0.001 | 0.0018 | positive |
| p1 Modulator of GABA-A receptor alpha-1beta-3gamma-2                                                                            | 0.001 | 0.0011 | negative |
| p0 TOX21 PGC ERR Agonist                                                                                                        | 0.001 | 0.0016 | negative |
| p1 TOX21 CAR Agonist                                                                                                            | 0.001 | 0.0016 | negative |
| p1 TOX21 DT40 657                                                                                                               | 0.001 | 0.0012 | positive |
| p0 Modulator of Angiotensin-converting enzyme                                                                                   | 0.001 | 0.0016 | positive |
| p1 Antagonist of the vitamin D receptor (VDR) signaling pathway                                                                 | 0.001 | 0.0015 | positive |
| p1 Modulator of Serotonin 4 (5-HT4) receptor                                                                                    | 0.001 | 0.0011 | negative |

|                                                                   |       |        |          |
|-------------------------------------------------------------------|-------|--------|----------|
| p0 ATG DR4 LXR CIS dn                                             | 0.000 | 0.0015 | positive |
| p0 TOX21 TSHR Agonist ratio                                       | 0.000 | 0.0014 | positive |
| p0 TOX21 MMP ratio up                                             | 0.000 | 0.0014 | negative |
| p1 Modulator of GABA-A receptor alpha-5beta-3gamma-2              | 0.000 | 0.0014 | negative |
| p1 ATG TA CIS up                                                  | 0.000 | 0.0012 | negative |
| p1 Modulator of Alpha-1b adrenergic receptor                      | 0.000 | 0.0012 | positive |
| p1 Agonist of H2AX                                                | 0.000 | 0.0012 | positive |
| p1 Modulator of Urotensin II receptor                             | 0.000 | 0.0012 | negative |
| p1 Modulator of Adenosine A3 receptor                             | 0.000 | 0.0012 | negative |
| p0 MammMutagenicity                                               | 0.000 | 0.0011 | positive |
| p0 Modulator of Serotonin 4 (5-HT4) receptor                      | 0.000 | 0.0011 | positive |
| p0 LTEA HepaRG CYP7A1 dn                                          | 0.000 | 0.0010 | positive |
| p0 TOX21 HSE BLA agonist ratio                                    | 0.000 | 0.0009 | negative |
| p0 BSK CASM3C VCAM1 down                                          | 0.000 | 0.0009 | positive |
| p0 Bioavailability                                                | 0.000 | 0.0009 | negative |
| p1 Modulator of Serotonin transporter                             | 0.000 | 0.0008 | positive |
| p1 Induce genoin human embryonic kidney cells                     | 0.000 | 0.0008 | negative |
| p0 Modulator of Alpha-1a adrenergic receptor                      | 0.000 | 0.0006 | negative |
| p1 Antagonist of the androgen receptor (AR) signaling pathway dup | 0.000 | 0.0006 | negative |
| p0 BSK hDFCGF IP10 down                                           | 0.000 | 0.0006 | positive |
| p1 Modulator of Angiotensin-converting enzyme                     | 0.000 | 0.0006 | positive |
| p0 Modulator of Sigma opioid receptor                             | 0.000 | 0.0006 | positive |
| p1 BSK 4H MCP1 down                                               | 0.000 | 0.0005 | positive |
| p0 Modulator of Vascular endothelial growth factor receptor 3     | 0.000 | 0.0004 | negative |
| p0 BSK KF3CT TGFb1 down                                           | 0.000 | 0.0004 | positive |
| p1 ATG NF kB CIS dn                                               | 0.000 | 0.0003 | positive |
| p0 Modulator of Serotonin 3a (5-HT3a) receptor                    | 0.000 | 0.0003 | negative |
| p1 ATG RARa TRANS dn                                              | 0.000 | 0.0003 | positive |
| p1 TOX21 p53 BLA p2 ratio                                         | 0.000 | 0.0002 | positive |
| p1 Modulator of Cannabinoid CB2 receptor                          | 0.000 | 0.0002 | positive |
| p1 Cytoin HEK293 cells 32 hour                                    | 0.000 | 0.0002 | positive |



|                                                                               |       |        |          |
|-------------------------------------------------------------------------------|-------|--------|----------|
| p1 Modulator of Serotonin 1a (5-HT1a) receptor                                | 0.000 | 0.0001 | negative |
| p1 Modulator of Sigma opioid receptor                                         | 0.000 | 0.0001 | positive |
| p0 Modulator of P2X purinoceptor 7                                            | 0.000 | 0.0001 | negative |
| p0 Modulator of TNF-alpha                                                     | 0.000 | 0.0001 | negative |
| p1 Antagonist of the estrogen receptor alpha (ER-alpha) signaling pathway dup | 0.000 | 0.0001 | negative |
| p0 ATG ISRE CIS dn                                                            | 0.000 | 0.0000 | negative |
| p1 Inhibitors and Substrates of Cytochrome P450 3A4                           | 0.000 | 0.0000 | negative |

**Table S2.** Full name of the assays with high correlation to the ten selected bioactivity descriptors.

| <b>Descriptor Name</b>                                        | <b>Assay title</b>                                                                                             |
|---------------------------------------------------------------|----------------------------------------------------------------------------------------------------------------|
| AMES                                                          | Ames test for mammalian environmental mutagenicity                                                             |
| Caco2                                                         | Caco-2 permeability assay to investigate intestinal permeability                                               |
| Inhibit CYP1A2 Activity                                       | Inhibitors of CYP1A2 activity assay                                                                            |
| Inhibit CYP2C19 Activity                                      | Inhibitors of CYP2C19 activity assay                                                                           |
| Inhibitors of Hepatocyte nuclear factor 4 (HNF4) dimerization | Inhibitors of Hepatocyte nuclear factor 4 (HNF4) dimerization assay                                            |
| Modulator of Alpha-2a adrenergic receptor                     | Modulator of alpha-2a adrenergic receptor assay                                                                |
| Modulator of Alpha-2b adrenergic receptor                     | Modulator of alpha-2b adrenergic receptor assay                                                                |
| Modulator of Bradykinin B2 receptor                           | Modulator of bradykinin B2 receptor assay                                                                      |
| Modulator of Monoamine oxidase A                              | Modulator of monoamine oxidase A assay                                                                         |
| Modulator of Muscarinic acetylcholine receptor M4             | Modulator of muscarinic acetylcholine receptor M4 assay                                                        |
| Modulator of P2X purinoceptor 3                               | Modulator of P2X purinoceptor 3 assay                                                                          |
| Modulator of Peroxisome proliferator-activated receptor gamma | Modulator of peroxisome proliferator-activated receptor gamma assay                                            |
| Modulator of Serotonin 1a (5-HT1a) receptor                   | Modulator of serotonin 1a (5-HT1a) receptor assay                                                              |
| Modulator of Serotonin 2a (5-HT2a) receptor                   | Modulator of serotonin 2a (5-HT2a) receptor assay                                                              |
| Modulators of myocardial damage                               | Modulators of myocardial damage assay                                                                          |
| MammMutagenicity                                              | Mammalian cell gene mutation assay                                                                             |
| PGPinhibition                                                 | P-glycoprotein (Pgp) inhibition assay                                                                          |
| ATG AP 1 CIS up                                               | Attogene human HepG2 FBJ murine osteosarcoma viral oncogene homolog 1 jun proto-oncogene assay                 |
| ATG MRE CIS up                                                | Attogene human HepG2 metal-regulatory transcription factor 1 assay                                             |
| ATG PPARg TRANS up                                            | Attogene TRANS-FACTORIAL HepG2 Human Peroxisome Proliferator-activated Receptor Gamma (PPARg) Activation Assay |
| ATG PXR TRANS up                                              | Attogene human HepG2 nuclear receptor subfamily 1, group I,                                                    |

|                        |                                                                                                                      |
|------------------------|----------------------------------------------------------------------------------------------------------------------|
|                        | member 2 assay                                                                                                       |
| ATG TA CIS up          | Attagene human HepG2 unspecified assay                                                                               |
| ATG VDRE CIS up        | Attagene human HepG2 vitamin D (1,25-dihydroxyvitamin D3) receptor assay                                             |
| BSK 3C MCP1 down       | Bioseek human umbilical vein endothelium chemokine (C-C motif) ligand 2 assay                                        |
| BSK 3C uPAR down       | Bioseek human umbilical vein endothelium plasminogen activator, urokinase receptor assay                             |
| BSK 3C VCAM1 down      | Bioseek human umbilical vein endothelium vascular cell adhesion molecule 1 assay                                     |
| BSK 4H Pselectin down  | Bioseek human umbilical vein endothelium selectin P (granule membrane protein 140kDa, antigen CD62) assay            |
| BSK 4H SRB down        | Bioseek human umbilical vein endothelium selectin P (granule membrane protein 140kDa, antigen CD62) assay            |
| BSK 4H VCAM1 down      | Bioseek human umbilical vein endothelium vascular cell adhesion molecule 1 assay                                     |
| BSK hDFCGF TIMP1 down  | Bioseek human foreskin fibroblast TIMP metalloproteinase inhibitor 1 assay                                           |
| BSK KF3CT MCP1 down    | Bioseek human keratinocytes and foreskin fibroblasts chemokine (C-C motif) ligand 2 assay                            |
| BSK KF3CT SRB down     | Bioseek human keratinocytes and foreskin fibroblasts unspecified assay                                               |
| BSK KF3CT TGFb1 down   | Bioseek human keratinocytes and foreskin fibroblasts transforming growth factor, beta 1 assay                        |
| BSK KF3CT uPA down     | Bioseek human keratinocytes and foreskin fibroblasts plasminogen activator, urokinase assay                          |
| BSK LPS SRB down       | Bioseek human umbilical vein endothelium and peripheral blood mononuclear cells unspecified assay                    |
| BSK SAg MCP1 down      | Bioseek human umbilical vein endothelium and peripheral blood mononuclear cells chemokine (C-C motif) ligand 2 assay |
| LTEA HepaRG CYP4A11 dn | LifeTech/Expression Analysis human HepaRG cytochrome P450, family 4, subfamily A, polypeptide 11 assay               |
| LTEA HepaRG CYP4A22 dn | LifeTech/Expression Analysis human HepaRG cytochrome P450, family 4, subfamily A, polypeptide 22 assay               |
| LTEA HepaRG DDIT3 up   | LifeTech/Expression Analysis human HepaRG DNA-damage-inducible transcript 3 assay                                    |
| LTEA HepaRG FMO3 dn    | LifeTech/Expression Analysis human HepaRG flavin                                                                     |

|                       |                                                                                                           |
|-----------------------|-----------------------------------------------------------------------------------------------------------|
|                       | containing<br>monooxygenase 3 assay                                                                       |
| LTEA HepaRG GSTA2 dn  | LifeTech/Expression Analysis human HepaRG glutathione S-transferase alpha 2 assay                         |
| LTEA HepaRG HMGCS2 dn | LifeTech/Expression Analysis human HepaRG 3-hydroxy-3-methylglutaryl-CoA synthase 2 (mitochondrial) assay |

**Table S3:** Comparison of the Skin Doctor CP and Skin Doctor CP:Bio approaches.

|                                         | <b>Skin Doctor CP</b> | <b>Skin Doctor CP:Bio</b> |
|-----------------------------------------|-----------------------|---------------------------|
| type of descriptors                     | MACCS Keys            | Bioactivity descriptors   |
| number of descriptors                   | 166                   | 10                        |
| n estimators                            | 1000                  | 500                       |
| max features                            | “sqrt”                | “auto”                    |
| random state                            | 43                    | 43                        |
| number of compounds in the test set     | 257                   | 257                       |
| number of compounds in the training set | 1028                  | 1021                      |

**Table S4:** Results of Skin Doctor CP on the test set.

| <b>Significance<br/>level <math>\epsilon</math></b> | <b>Validity</b> | <b>Efficiency</b> | <b>ACC</b> | <b>MCC</b> | <b>CCR</b> | <b>SE</b> | <b>SP</b> | <b>NPV</b> | <b>PPV</b> |
|-----------------------------------------------------|-----------------|-------------------|------------|------------|------------|-----------|-----------|------------|------------|
| 0.05                                                | 0.96            | 0.32              | 0.89       | 0.78       | 0.89       | 0.91      | 0.88      | 0.94       | 0.83       |
| 0.10                                                | 0.91            | 0.49              | 0.83       | 0.66       | 0.84       | 0.90      | 0.78      | 0.92       | 0.72       |
| 0.20                                                | 0.82            | 0.79              | 0.77       | 0.55       | 0.78       | 0.84      | 0.72      | 0.88       | 0.65       |
| 0.30                                                | 0.69            | 0.92              | 0.75       | 0.51       | 0.76       | 0.81      | 0.70      | 0.84       | 0.65       |
